# Supplementary material for: Development of an Assay for the Identification of Receptor Binding Proteins from Bacteriophages
Source: Viruses. 2016 Jan 11;8(1):17. doi: 10.3390/v8010017 (PMC4728577; doi:10.3390/v8010017)
Supplement: Supplementary file 1 [file viruses-08-00017-s001.xlsx]

## Sheet: Blastx analysis of ECTP1_00145 
Table S1. Blastx analysis of ECTP1_00145
Description	Max score	Total score	Query cover	E value	Ident	Accession
putative tail fiber protein GP37 [Escherichia phage wV8]	731	731	0.99	0	1	YP_002922865.1
putative tail fiber protein [Escherichia phage HY02]	721	721	0.99	0	0.98	AIK67887.1
capsid and scaffold protein [Escherichia phage EC6]	711	711	0.99	0	0.97	YP_009151296.1
tail fiber protein [Escherichia phage vB_EcoM-VpaE1]	575	575	0.99	0	0.78	YP_009147343.1
tail fiber protein [Escherichia phage vB_EcoM_AYO145A]	574	574	0.99	0	0.78	AKC04905.1
putative tail fiber protein [Escherichia phage JH2]	555	555	0.99	0	0.76	AGR48475.1
long tail fiber protein [Salmonella phage HB-2014]	551	551	0.99	0	0.75	YP_009146321.1
putative tail fiber protein [Staphylococcus phage SA1]	550	550	0.99	0	0.75	YP_009168663.1
tail fiber protein [Salmonella phage Mushroom]	547	547	0.99	0	0.76	AJF40589.1
tail fiber protein [Salmonella phage SBA-1781]	546	546	0.99	0	0.76	AFU63437.1
Putative tail fiber protein GP37 [Salmonella phage FelixO1]	545	545	0.99	0	0.76	NP_944921.1
putative tail fiber protein [Enterobacteriaphage UAB_Phi87]	534	534	0.99	0	0.77	YP_009150171.1
putative tail fiber protein [Escherichia phage phiSUSP2]	505	505	0.99	9e-175	0.7	ALH47185.1
baseplate wedge subunit and tail pin [Citrobacter phage Moogle]	498	498	0.99	8e-172	0.68	YP_009145700.1
tail fiber protein [Citrobacter phage Michonne]	493	493	0.99	7e-170	0.68	AKU44009.1
putative tail fiber protein [Escherichia phage phiSUSP1]	486	486	0.99	2e-167	0.68	ALH47055.1
tail fiber protein [Erwinia phage phiEa104]	295	295	0.99	6e-93	0.47	YP_004327045.1
putative tail fiber protein [Erwinia phage phiEa21-4]	294	294	0.99	2e-92	0.47	YP_002456092.1
tail fiber [Erwinia phage vB_EamM-M7]	279	279	0.99	9e-87	0.45	AEJ81298.1
Putative tail fiber protein [Erwinia phage phiEa116]	278	278	0.99	3e-86	0.44	CCA66288.1
putative tail fiber protein [Salmonella phage FSL SP-010]	478	478	0.68	6e-166	0.86	AGF88729.1
putative tail fiber protein [Salmonella phage FSL SP-107]	478	478	0.67	7e-166	0.86	AGF89440.1
phage tail fiber protein [Escherichia coli]	110	110	0.55	9e-23	0.39	WP_001613294.1
hypothetical protein WR17_12490 [Escherichia coli]	104	104	0.55	4e-22	0.36	KLH27863.1
phage tail protein [Escherichia coli]	106	106	0.55	1e-21	0.37	WP_032250185.1
phage tail protein [Escherichia coli]	103	103	0.55	1e-20	0.39	WP_024216547.1
phage tail fiber protein [Escherichia coli]	103	103	0.55	2e-20	0.39	WP_001559528.1
phage tail protein [Escherichia coli]	103	103	0.55	2e-20	0.39	WP_053881948.1
phage tail protein [Escherichia coli]	103	103	0.55	2e-20	0.39	WP_047088576.1
phage tail protein [Escherichia coli]	103	103	0.55	2e-20	0.39	WP_040090438.1
hypothetical protein [Escherichia coli]	102	102	0.55	2e-20	0.39	WP_038820201.1
gp37, tail fiber [Enterobacteria phage SV14]	100	100	0.5	7e-21	0.35	CAA91919.1
gp37 long tail fiber distal subunit [Enterobacteria phage vB_EcoM-VR7]	104	104	0.5	1e-20	0.37	YP_004063946.1
putative tail fiber protein [Escherichia phage phiSUSP2]	117	117	0.48	1e-24	0.39	ALH47186.1
putative tail fiber protein [Escherichia phage phiSUSP1]	113	113	0.48	2e-23	0.38	ALH47056.1
hypothetical protein [Escherichia coli]	109	109	0.47	4e-24	0.41	WP_038428222.1
putative tail fiber protein [Staphylococcus phage SA1]	119	119	0.47	2e-25	0.43	YP_009168664.1
putative tail fiber protein [Salmonella phage HB-2014]	117	117	0.47	8e-25	0.43	YP_009146322.1
putative tail fiber protein [Enterobacteriaphage UAB_Phi87]	113	113	0.47	2e-23	0.42	YP_009150170.1
tail fiber protein [Citrobacter phage Michonne]	112	112	0.47	2e-23	0.41	AKU44008.1
tail fiber protein [Citrobacter phage Mordin]	112	112	0.47	2e-23	0.41	ALA06874.1
tail fibers protein [Salmonella phage SBA-1781]	111	111	0.47	6e-23	0.41	AFU63436.1
tail fibers protein [Salmonella phage SPT-1]	111	111	0.47	6e-23	0.41	AFU63552.1
Putative tail fiber protein [Salmonella phage FelixO1]	110	110	0.47	2e-22	0.41	NP_944923.1
tail fiber protein [Salmonella phage Mushroom]	109	109	0.47	2e-22	0.41	AJF40588.1
hypothetical protein AN659_02340 [Enterobacter cloacae subsp. cloacae]	107	107	0.29	2e-23	0.56	KPQ85085.1
short-chain fatty acid transporter [Escherichia coli]	106	106	0.29	3e-23	0.57	AHM43535.1
hypothetical protein UH30_23970 [Escherichia coli]	104	104	0.29	7e-23	0.56	KJA01516.1
phage tail fiber repeat family protein [Escherichia coli P0304816.12]	103	103	0.29	2e-22	0.53	ENF33961.1
short-chain fatty acid transporter [Escherichia coli]	104	104	0.29	2e-22	0.53	WP_024208059.1
hypothetical protein ABF63_18835 [Enterobacter cloacae]	104	104	0.29	2e-22	0.52	KLQ77673.1
phage tail fiber repeat family protein [Escherichia coli]	104	104	0.29	3e-22	0.53	WP_001620747.1
hypothetical protein SS01_22115 [Enterobacter cloacae]	104	104	0.29	3e-22	0.52	KJO25483.1
short-chain fatty acid transporter [Escherichia coli]	101	101	0.29	3e-22	0.53	WP_024246402.1
hypothetical protein [Escherichia coli]	108	108	0.29	3e-22	0.56	WP_044081857.1
phage tail fiber repeat family protein [Escherichia coli 2730350]	105	105	0.29	7e-22	0.53	ENA86895.1
phage tail protein [Escherichia coli]	107	107	0.29	7e-22	0.53	WP_047090223.1
phage tail fiber repeat family protein [Escherichia coli P0304816.7]	103	103	0.29	9e-22	0.53	ENF61429.1
phage tail protein [Escherichia coli]	106	106	0.29	1e-21	0.53	WP_042969324.1
short-chain fatty acid transporter [Escherichia coli]	103	103	0.29	1e-21	0.53	KLH91524.1
hypothetical protein SS19_06215 [Enterobacter cloacae]	102	102	0.29	1e-21	0.52	KJL56021.1
hypothetical protein SR76_12125 [Enterobacter cloacae]	101	101	0.29	2e-21	0.51	KJP72894.1
phage tail fiber repeat family protein [Escherichia coli 1-392-07_S4_C3]	99.4	99.4	0.29	3e-21	0.54	KEN81314.1
hypothetical protein LI66_16940 [Enterobacter cloacae]	100	100	0.29	4e-21	0.51	AJB84181.1
hypothetical protein SG79_17960 [Enterobacter cloacae]	100	100	0.29	4e-21	0.51	KJX44172.1
phage tail fiber repeat family protein [Escherichia coli 2-005-03_S1_C3]	100	100	0.29	4e-21	0.54	EZK13318.1
hypothetical protein ABF71_22225 [Enterobacter cloacae]	100	100	0.29	5e-21	0.51	KLQ26844.1
phage tail fiber repeat family protein [Escherichia coli 2-156-04_S3_C1]	100	100	0.29	6e-21	0.53	KDW02205.1
phage tail protein [Escherichia coli]	105	105	0.26	5e-21	0.57	WP_032191999.1
phage tail protein [Escherichia coli]	105	105	0.26	6e-21	0.57	WP_000108489.1
phage tail protein [Escherichia coli]	105	105	0.26	6e-21	0.57	WP_052923054.1
phage tail protein [Escherichia coli]	104	104	0.26	6e-21	0.57	WP_054626495.1
phage tail fiber repeat family protein [Escherichia coli 1-182-04_S4_C2]	100	100	0.26	6e-21	0.56	EZJ42148.1
Side tail fiber protein from bacteriophage origin [Escherichia coli HM605]	101	101	0.26	7e-21	0.56	EIL71065.1
phage tail fiber repeat family protein [Escherichia coli 2846750]	97.8	97.8	0.26	9e-21	0.56	EMZ59450.1
phage tail fiber repeat family protein [Escherichia coli BCE032_MS-12]	101	101	0.26	9e-21	0.56	ENB38924.1
long tail fiber protein p37 [Shigella flexneri K-315]	102	102	0.26	9e-21	0.56	EIQ21292.1
tail protein [Escherichia coli]	104	104	0.26	1e-20	0.56	WP_033550501.1
hypothetical protein [Escherichia coli]	104	104	0.26	1e-20	0.56	WP_001534332.1
hypothetical protein [Escherichia coli]	104	104	0.26	1e-20	0.56	WP_021563149.1
short-chain fatty acid transporter [Escherichia coli]	104	104	0.26	1e-20	0.56	WP_000104716.1
phage tail fiber repeat family protein [Escherichia coli 2872000]	101	101	0.26	2e-20	0.55	EMV62153.1
phage tail fiber repeat family protein [Escherichia coli BCE030_MS-09]	102	102	0.26	4e-20	0.56	ENB28302.1
phage tail protein [Escherichia coli]	102	102	0.26	4e-20	0.56	WP_053889027.1
phage tail fiber protein [Escherichia coli]	102	102	0.26	4e-20	0.56	WP_032287570.1
phage tail fiber repeat family protein [Escherichia coli 3-073-06_S4_C3]	102	102	0.26	4e-20	0.56	KDZ79081.1
phage tail protein [Escherichia coli]	102	102	0.26	4e-20	0.56	WP_053902476.1
phage tail fiber repeat family protein [Escherichia coli 3-073-06_S4_C1]	102	102	0.26	4e-20	0.56	KDU34276.1
hypothetical protein [Escherichia coli]	97.1	97.1	0.26	4e-20	0.52	WP_001624807.1
short-chain fatty acid transporter [Salmonella enterica subsp. enterica serovar Infantis]	99	99	0.26	8e-20	0.55	KNB28030.1
hypothetical protein KV39_06595 [Escherichia coli]	95.1	95.1	0.26	8e-20	0.52	KGA87659.1
hypothetical protein AE17_01327 [Escherichia coli UCI 58]	95.9	95.9	0.26	8e-20	0.52	KDG89942.1
short-chain fatty acid transporter [Escherichia coli]	96.7	96.7	0.26	9e-20	0.5	KFH78014.1
hypothetical protein [Escherichia coli]	99	99	0.26	1e-19	0.53	WP_016233435.1
prophage tail fiber domain-containing protein [Escherichia coli K71]	99	99	0.26	1e-19	0.53	KRR57681.1
hypothetical protein Q457_17870 [Escherichia coli ATCC BAA-2196]	96.3	96.3	0.26	1e-19	0.5	ETI74864.1
short-chain fatty acid transporter [Escherichia coli O26:H11 str. 2010C-4819]	95.5	95.5	0.26	1e-19	0.5	EZG56210.1
phage tail protein [Escherichia coli]	100	100	0.26	1e-19	0.5	WP_045894452.1
short-chain fatty acid transporter [Escherichia coli O123:H11 str. 2009C-3307]	95.5	95.5	0.26	1e-19	0.5	EZE17057.1
phage tail protein [Escherichia coli]	100	100	0.26	1e-19	0.54	WP_040234776.1
